1 **Title: Optimization of the cultivation conditions of indigenous**  
2 **wild yeasts and evaluation of their leavening capacity**

3

4 **Elsa Beyene Gebreslassie<sup>1\*</sup>, Anteneh T. Tefera<sup>2</sup>, Diriba Muleta<sup>2</sup>, Solomon K. Fantaye<sup>3</sup>, and**  
5 **Gary M. Wessel<sup>4</sup>**

6 <sup>1</sup> Department of Microbial, Cellular and Molecular Biology, Addis Ababa University, King Goerge VI Street,  
7 P.O.Box 1176, Addis Ababa, Ethiopia

8 <sup>2</sup> Institute of Biotechnology, Addis Ababa University, King Goerge VI Street, P.O.Box 1176, Addis Ababa,  
9 Ethiopia;

10 <sup>3</sup> School of Biochemical Engineering, Addis Ababa Institute of Technology, King Goerge VI Street, P.O.Box 385,  
11 Addis Ababa, Ethiopia

12 <sup>4</sup> Department of Molecular and Cellular Biology and Biochemistry, Brown University, 185 Meeting Street,  
13 Providence RI 02912 USA

14

15

16

\*elsabeyene3@gmail.com, [elsa.beyene@aau.edu.et](mailto:elsa.beyene@aau.edu.et)

17

18

19

20

21

22

23

24

25

26

27

28

29

## 30 **Abstract**

31 Ethiopia has a high demand for baker's yeast in the bread and beverage industries.  
32 Unfortunately, Ethiopia has no producing plant for baker's yeast and instead relies on costly  
33 imports. The objective of this work was to identify the most productive and useful indigenous  
34 baker's yeasts isolated from local fermented foods and drinks, honey and Molasses using  
35 leavening ability as the major metric. Six of the test isolates produced a maximum cell mass at  
36 30°C, pH of 5.5 and 48 hours of incubation. Isolate AAUTf1 did not produce hydrogen sulfide,  
37 while isolates AAUTf5, AAUTj15 and AAUSh17 produced low levels of this chemical, and  
38 isolates AAUMI20 and AAUWt21 produced high levels of hydrogen sulfide, neglecting their  
39 utility in baking. The leavening performance of isolates AAUTf1 (*Candida humilis*) and  
40 AAUTf5 (*Kazachstania bulderi*) had the highest dough volume of 131 cm<sup>3</sup> and 128 cm<sup>3</sup>  
41 respectively in 120 min. Isolates AAUSh17 (*Saccharomyces cerevisiae*) and AAUTj15  
42 (*Saccharomyces cerevisiae*) raised the dough volume of 127 cm<sup>3</sup> and 125 cm<sup>3</sup> respectively, at 60  
43 min compared to commercial yeast (117 cm<sup>3</sup> in 90 min). The study also revealed that mixed  
44 cultures of indigenous yeasts had better leavening capacity than single cultures. The co-  
45 inoculated cultures of AAUTf1 + AAUTf5 + AAUTj15, AAUTf5 + AAUTj15, and AAUTf1 +  
46 AAUTj15 + AAUSh17 reached 143 cm<sup>3</sup> at 90 min, 141 cm<sup>3</sup> and 140 cm<sup>3</sup> both at 60 min,  
47 respectively. Thus, the indigenous isolates are candidates for optimizing utilization of yeast for  
48 fast promotion and utilization in the bakery industries.

49

50

51

52

## 53 **Introduction**

54           The world population is growing and is expected to reach 9 billion people by the middle  
55 of this century [1]. One of the consequences of this increment in population is a higher  
56 consumption and a larger demand for processed food such as bread [2]. The greater demand for  
57 bread as a staple food for human consumption has led to the development and expansion of the  
58 baker's yeast industry [3].

59           Bread is a major nutritional component of humans and bread making is one of the oldest  
60 processes worldwide, known and practiced for thousands of years [4]. Yeasts are the major  
61 microorganism involved in bread making with key role of leavening bread dough  
62 Leavening is the metabolic process whereby yeast converts the carbohydrates in the dough to  
63 carbon dioxide gas that expands the dough prior to baking [5, 6].

64           Baker's yeast (*Saccharomyces cerevisiae*) is the common name for the yeast commonly  
65 used as a leavening agent in baking bread and other bakery products, where it converts the  
66 fermentable sugars present in the dough into carbon dioxide and ethanol [7]. The fermentative  
67 activity of baker's yeast is essential not only for the rising action of the dough by a production of  
68 carbon dioxide but also in a production of the wide range of aromatic compounds identified in  
69 bread [8].

70           Baked foods are widely consumed in Ethiopia and play an important role in the local  
71 economy [9]. The bakery sector is constantly growing in Ethiopia due to an increasing demand  
72 for bread (particularly commercially prepared bread), constant growth in income, population,  
73 urbanization, and due to the shift from traditional consumption habits to fast food. Moreover, a  
74 number of alcohol and beverage industries (beer and wine) are active and these industries need

75 tremendous amounts of yeast. As a result, the use of commercial baker's yeast is increasing day  
76 to day in the country.

77 The supply of commercial yeast in Ethiopia is currently met by importation due to lack of  
78 baker's yeast producing plants in the country [10]. The country spent 293,010,632 ETB  
79 (14,650,531.6 US \$) in 2016 (CSA 2016) for the imported baker's yeast. This vital and highly  
80 expensive import necessitates alternatives for national development since the raw materials  
81 (molasses and wild yeasts) essential to isolate industrial yeasts are locally available.

82 Many different substrates (fermented foods, fermented beverages, citrus juice, sugarcane  
83 juice, molasses and others) are available for the isolation of yeast species [9, 11-13]. However,  
84 the leavening capacity of wild yeasts isolated from these substrates (*teff* dough, wheat dough,  
85 *shamita*, *tej*, and molasses) needs proper investigation in order to develop commercial scale  
86 production.

87 Therefore, it is necessary to isolate and develop superior performing baker's yeast, which  
88 would fulfill this demand and thereby save the country enormous expenses. The principal  
89 purpose of the present study was to optimize the cultivation conditions of indigenous wild yeasts  
90 isolated from local fermented foods and beverages and compared to the commercial baker's  
91 yeast based on their leavening ability in wheat dough.

92

## 93 **Materials and methods**

94 Yeasts isolated from fermented foods (*teff* dough, wheat dough), fermented beverages  
95 (*Tej*, *shamita*) and molasses including the commercial yeast (control) were grown on yeast  
96 extract peptone dextrose agar (YEPDA). The isolates were transferred to respective slant  
97 medium and preserved at 4°C for further study. The yeast strains used in this study were obtained  
98 from my previous research result and were identified using molecular method and the nucleotide  
99 sequence was performed at Genwiz, USA. Yeast species name used in this experiment,  
100 designation and their source are listed in table 1.

101 Table 1. Yeast species name, designation and their source

| Species name                                      | Designation | Source            |
|---------------------------------------------------|-------------|-------------------|
| <i>Candida humilis</i> (KY102138.1, CBS)          | AAUTf       | <i>Teff</i> dough |
| <i>Kazachstania bulderi</i> (KY103628.1, CBS)     | AAUTf       | <i>Teff</i> dough |
| <i>Saccharomyces cerevisiae</i> (KY105143.1, CBS) | AAUSh       | <i>Shamita</i>    |
| <i>Saccharomyces cerevisiae</i> (KY630581.1, CBS) | AAUTj       | <i>Tej</i>        |
| <i>Pichia kudriavzevii</i> (KY104596.1, CBS)      | AAUWt       | Wheat dough       |
| <i>Pichia fermentans</i> (KY104550.1, CBS)        | AAUMI       | Molasses          |

102

## 103 **Optimization of cultivation condition for yeast growth**

### 104 **Effect of pH on yeasts growth**

105 Isolated yeasts and control (commercial yeast) were separately cultured in yeast extract  
106 peptone dextrose (YEPD) broth containing yeast extract 1.0%, peptone 2.0%, and dextrose 2.0%.  
107 The pH values were adjusted to 3.5, 4, 4.5, 5 and 5.5 and incubated at 30°C for 48 hours under  
108 shaking at 120 rpm [14]. Two 250ml flasks containing 50 ml broth for the listed pH values were  
109 each inoculated with 1 ml of a 48 hour-old yeast culture (approximately  $1.2 \times 10^8$  CFU)

110 separately. Optical densities at 600 nm were determined using a spectrophotometer (UV-VIS  
111 spectrophotometer, USA) as a measure of growth. The culture medium was used as blank.

### 112 **Effect of temperature on yeast growth**

113 The ability of the isolates including the control to grow at different temperature values  
114 was examined by inoculating duplicate flasks with 50 ml YEPD broth medium. The experiment  
115 was arranged at four different temperatures values (25, 30, 35, and 40°C) and at optimum pH 5.5  
116 (a result of this study), inoculated with the same number of actively grown yeast cells (48 hours  
117 old), 1 ml (approximately  $1.2 \times 10^8$ CFU). After 48 hours of incubation optical density were  
118 determined the same method as indicated above.

### 119 **Determination of optimum length of time for yeasts growth**

120 The optimum time of incubation for a maximum cell biomass production of each yeast isolate  
121 and control (commercial yeast) was determined by incubating cultures at optimum temperature  
122 (30°C; result of this study) for 24, 48, 72, 96 and 120 hours. The same number of active yeast  
123 cells grown in YEPD for 48 hours, 1 ml (approximately  $1.2 \times 10^8$ CFU) was inoculated in  
124 duplicates in 50 ml YEPD broth in 250 ml flasks. The best incubation time for growth and  
125 maximum biomass production was detected by measuring optical density as indicated above.

126

### 127 **The interaction effect of temperature, pH and incubation time on yeast** 128 **growth**

129 The 48 hours old yeast (30°C, 120 rpm) cultured in YEPD broth were inoculated with the  
130 same number of actively grown yeast cells 1 ml (approximately  $1.2 \times 10^8$  CFU ) at five pH levels  
131 (3.5, 4, 4.5, 5 and 5.5) and incubated at 25, 30, 35 and 40°C being shaken at 120 rpm for five

132 days. Samples were taken and analyzed at interval of 24, 48, 72, 96 and 120 hours. Optimum  
133 temperature, pH and incubation time for yeast growth and maximum biomass production were  
134 determined by using spectrophotometer at 600 nm (UV-VIS spectrophotometer, USA).

### 135 **Test of hydrogen sulfide production**

136 To examine production H<sub>2</sub>S (associated with an off-flavor and unpleasant taste), test  
137 strains and the control (commercial yeast) were streak cultured on Bismuth Sulfate Agar (BSA)  
138 plates and incubated at 30°C for 2 days. Colonies that exhibited significant black color along the  
139 line of inoculation on BSA plates indicated hydrogen sulfide production [15]. Positive strains  
140 were discarded as their palatability for humans is compromised.

### 141 **Preparation of wheat bread with selected yeast isolates**

#### 142 **Analysis of bread leavening potential of selected yeasts**

143 Bread dough was prepared with candidate isolates to observe the baking potency  
144 according to [3]. Selected yeast species and the control for dough making were grown in YEPD  
145 broth for 48 hours at optimum temperature of 30°C being shaken at 120 rpm. Samples (10 ml  
146 each) were centrifuged for 10 min at 5,000 rpm, washed twice with deionized water, and the  
147 supernatant was discarded. The sedimented yeast biomass with moisture was transferred to pre-  
148 weighed filter paper, dried overnight at 60°C, and stored in a desiccator until a constant weight  
149 was obtained [10]. The yeast culture was harvested and weighed using an analytical balance  
150 (FA2104, China).

151 Prepared dough for this assay contained wheat flour (50 g), harvested yeast culture (0.5  
152 g), table sugar (0.2 g). These ingredients were properly mixed with distilled water (40 ml) and  
153 added into 250 ml measuring cylinders. Commercial yeast (Saf- instant, from Turkey) was used

154 separately as a positive control to ferment the dough. Another set of dough formulation that did  
155 not contain any yeast sample was prepared as the negative control. The dough samples were left  
156 to ferment at ambient (24°C) and 30°C temperatures for 3 hours. The dough volume was  
157 determined by measuring the mean of volume increment at every 30 min interval for 3 hours. All  
158 dough samples were covered using aluminum foil.

### 159 **Formulation of mixed culture and testing bread leavening potential**

160 The effect of combined (mixed) yeast culture on leavening activity was evaluated. Dough  
161 was prepared with commercial yeast and without yeast as positive and negative control. The  
162 ingredients used for the dough preparation were wheat flour (50 g), harvested yeast culture (0.5  
163 g), table sugar (0.2 g) and distilled water (40 ml). The ingredients were mixed to homogeneity  
164 and incubated at the optimum temperature of 30°C (based on previous result of this study).  
165 Single and mixed isolates of yeast cultures used for this test are listed in (Table 2). Two  
166 replicates were performed for each type of dough fermentation. The rising power of the  
167 combined (mixed) and single (mono) yeast was determined by recording the dough volume  
168 increment starting from zero to two hours at 30 min interval. Aluminum foil was used to cover  
169 the dough containing measuring cylinders.

170 Table 2. Formulation for bread dough preparation.

| Mixed culture | Harvested yeast culture<br>in gram | Wheat flour<br>in gram | Table sugar<br>in gram | dH <sub>2</sub> O in ml |
|---------------|------------------------------------|------------------------|------------------------|-------------------------|
| X1            | 0.5                                | 50                     | 0.2                    | 40                      |
| X2            | 0.5                                | 50                     | 0.2                    | 40                      |
| X3            | 0.5                                | 50                     | 0.2                    | 40                      |
| X4            | 0.5                                | 50                     | 0.2                    | 40                      |
| X5            | 0.5                                | 50                     | 0.2                    | 40                      |
| X6            | 0                                  | 50                     | 0.2                    | 40                      |
| X1+X2         | 0.5                                | 50                     | 0.2                    | 40                      |
| X1+X3         | 0.5                                | 50                     | 0.2                    | 40                      |
| X1+X4         | 0.5                                | 50                     | 0.2                    | 40                      |
| X2+X3         | 0.5                                | 50                     | 0.2                    | 40                      |
| X2+X4         | 0.5                                | 50                     | 0.2                    | 40                      |



|             |     |    |     |    |
|-------------|-----|----|-----|----|
| X3+X4       | 0.5 | 50 | 0.2 | 40 |
| X1+X2+X3    | 0.5 | 50 | 0.2 | 40 |
| X2+X3+X4    | 0.5 | 50 | 0.2 | 40 |
| X1+X3+X4    | 0.5 | 50 | 0.2 | 40 |
| X1+X2+X3+X4 | 0.5 | 50 | 0.2 | 40 |

171 Note: nomination for isolates X1 (AAUTf1), X2 (AAUTf5), X3 (AAUTj15), X4 (AAUSh17), X5 (+ve control/commercial  
172 yeast), X6 (-Ve control)

## 173 **Statistical analysis of the experiments**

174 The analysis of variance (ANOVA) of the different sets of experiments or combinations  
175 was performed using R software version 3.3.1 [16]. The mean comparison was made using least  
176 significant difference (LSD) test at 5% significant level.

177

178

179

180

181

182

183

184

185

## 186 **Results**

### 187 **Optimization of cultivation conditions for yeast growth**

#### 188 **The effect of pH on yeast biomass**

189 Growth of the isolates varied at different pH values (Table 3). Although all isolates grew  
190 at each of the pH levels tested, the minimum and maximum growth yield was observed at pH 3.5  
191 and 5.5 values, respectively. The maximum biomass yields of OD reading at 600 nm reading at

192 pH 5.5 for isolate AAUM120, AAUSh17, AAUWt21 and AAUTj15 were 2.57, 2.45, 2.25 and  
 193 2.23 respectively. Isolate AAUM120 was found to gain the highest biomass yield at the same pH  
 194 value. However, the maximum biomass yield (1.844) for the control was achieved at pH 5. There  
 195 were significant ( $p < 0.05$ ) differences among the biomass yield of the isolates at each pH values  
 196 (Table 3).

197  
 198 Table 3. Mean biomass of Yeasts under different pH ranges

| Isolate | pH3.5                 | pH4                     | pH4.5                  | pH5                    | pH5.5                 |
|---------|-----------------------|-------------------------|------------------------|------------------------|-----------------------|
| AAUTf1  | 0.64 <sup>op</sup>    | 1.56 <sup>defgh</sup>   | 1.50 <sup>defghi</sup> | 1.82 <sup>bcdef</sup>  | 1.91 <sup>bcde</sup>  |
| AAUTf5  | 0.57 <sup>p</sup>     | 1.43 <sup>fghij</sup>   | 1.51 <sup>defghi</sup> | 1.63 <sup>defgh</sup>  | 1.85 <sup>bcdef</sup> |
| AAUTj15 | 0.76 <sup>mnop</sup>  | 1.28 <sup>ghijk</sup>   | 1.2 <sup>hijklm</sup>  | 1.56 <sup>defgh</sup>  | 2.23 <sup>abc</sup>   |
| AAUSh17 | 0.74 <sup>nop</sup>   | 1.05 <sup>ijklmno</sup> | 1.2 <sup>hijklm</sup>  | 1.81 <sup>bcdef</sup>  | 2.45 <sup>a</sup>     |
| AAUM120 | 0.83 <sup>lmnop</sup> | 1.09 <sup>ijklmn</sup>  | 1.25 <sup>ghijkl</sup> | 1.47 <sup>efghij</sup> | 2.57 <sup>a</sup>     |
| AAUWt21 | 0.73 <sup>nop</sup>   | 0.97 <sup>klmnop</sup>  | 1.68 <sup>defg</sup>   | 1.94 <sup>bcd</sup>    | 2.25 <sup>ab</sup>    |
| Control | 1.67 <sup>defg</sup>  | 1.68 <sup>defg</sup>    | 1.67 <sup>defg</sup>   | 1.84 <sup>bcdef</sup>  | 1.77 <sup>cdef</sup>  |

199 Note: CY stands for commercial yeast  
 200 Means with the same letter are not significantly different at  $p < 0.05$ .

201  
 202 **The effect of temperature on yeast biomass**

203 The yeast isolates grew at all temperature values (Table 4). The maximum biomass yield  
 204 for all the six yeast isolates and the control was at 30°C and the minimum biomass yield for all  
 205 the isolates (including the control) was above 35°C. At 30°C, the AAUM120 isolate exhibited the  
 206 maximal growth but biomass yield of all the isolates was significantly higher at 30°C than at all  
 207 other temperature values (25°C, 35°C and 40°C) (Table 4).

208

209 Table 4. Mean biomass of potent yeasts under different temperature ranges (values given are  
210 O.D.600).

| Isolate | 25°C                 | 30°C               | 35°C                 | 40°C                 |
|---------|----------------------|--------------------|----------------------|----------------------|
| AAUTf1  | 0.6 <sup>hijk</sup>  | 1.9 <sup>d</sup>   | 0.56 <sup>hijk</sup> | 0.47 <sup>jk</sup>   |
| AAUTf5  | 0.61 <sup>hij</sup>  | 1.87 <sup>de</sup> | 0.58 <sup>hijk</sup> | 0.40 <sup>k</sup>    |
| AAUTj15 | 0.56 <sup>hijk</sup> | 2.21 <sup>c</sup>  | 0.59 <sup>hijk</sup> | 0.46 <sup>jk</sup>   |
| AAUSh17 | 0.64 <sup>hij</sup>  | 2.39 <sup>ab</sup> | 0.72 <sup>h</sup>    | 0.52 <sup>hijk</sup> |
| AAUMI20 | 0.67 <sup>hi</sup>   | 2.6 <sup>a</sup>   | 0.69 <sup>hi</sup>   | 0.53 <sup>hijk</sup> |
| AAUWt21 | 0.51 <sup>ijk</sup>  | 2.27 <sup>bc</sup> | 0.57 <sup>hijk</sup> | 0.52 <sup>ijk</sup>  |
| control | 1.42 <sup>f</sup>    | 1.79 <sup>de</sup> | 1.63 <sup>e</sup>    | 1.11 <sup>g</sup>    |

211 Note: CY stands for commercial yeast

212 Means with the same letter are not significantly different at  $p < 0.05$ .

213

### 214 **Effect of incubation period on yeast biomass yield**

215 The effect of incubation time on the growth rates of the six isolates and the control at  
216 optimum temperature (30°C) and pH of 5.5 is shown in Table 5. Maximum biomass yield was  
217 obtained for all the yeast isolates of this study at 48 hours but the minimum biomass yield was  
218 recorded decreasing thereafter to the minimum level at 120 hours. Isolate AAUMI20 achieved  
219 the highest biomass yield (2.57, OD<sub>600nm</sub>) at 48 hours of incubation time and optimum  
220 temperature 30°C followed by isolate AAUSh17 (2.41, OD<sub>600nm</sub>) under the same incubation time  
221 and temperature. Table 5 documents the biomass yield for all isolates and we conclude from  
222 these results that, except for the control with an optimal incubation time of 72 hours, all other  
223 isolates peaked growth characteristics at 48 hours.

224

225

226 Table 5. Mean growth of Yeasts under different incubation time ranges (OD<sub>600nm</sub>)

| Isolate     | 24 hours            | 48 hours            | 72 hours            | 96 hours            | 120 hours          |
|-------------|---------------------|---------------------|---------------------|---------------------|--------------------|
| AAUTf1      | 1.6 <sup>gh</sup>   | 1.96                | 1.05 <sup>jk</sup>  | 0.59 <sup>o</sup>   | 0.36 <sup>q</sup>  |
| AAUTf5      | 1.49 <sup>h</sup>   | 1.81 <sup>ef</sup>  | 0.79 <sup>n</sup>   | 0.94 <sup>klm</sup> | 0.52 <sup>op</sup> |
| AAUTj15     | 1.68 <sup>efg</sup> | 2.12 <sup>cd</sup>  | 1.33 <sup>i</sup>   | 0.84 <sup>mn</sup>  | 0.61 <sup>o</sup>  |
| AAUSh17     | 1.79 <sup>ef</sup>  | 2.43 <sup>b</sup>   | 0.91 <sup>lmn</sup> | 0.81 <sup>mn</sup>  | 0.43 <sup>pq</sup> |
| AAUMI20     | 1.7 <sup>efg</sup>  | 2.6 <sup>a</sup>    | 0.99 <sup>kl</sup>  | 0.83 <sup>mn</sup>  | 0.43 <sup>pq</sup> |
| AAUWt21     | 1.66 <sup>fg</sup>  | 2.21 <sup>c</sup>   | 1.15 <sup>j</sup>   | 0.98 <sup>kl</sup>  | 0.53 <sup>op</sup> |
| CY(Control) | 1.31 <sup>i</sup>   | 1.74 <sup>efg</sup> | 1.99 <sup>cd</sup>  | 1.81 <sup>e</sup>   | 1.8 <sup>e</sup>   |

227 Note: CY stands for commercial yeast

228 Means with the same letter are not significantly different at  $p < 0.05$ .

229

## 230 **Combined effect of temperature, pH and incubation time on yeast biomass**

### 231 **yield**

232 The maximum cell density 1.89, 1.82, 2.17, 2.41, 2.56 and 2.23 of OD at 600nm for  
233 isolates AAUTf1, AAUTf5, AAUTj15, AAUSh17, AAUMI20 and AAUWt21 respectively, were  
234 obtained at 30°C, pH 5.5 and 48 hours of incubation (data not shown). On the other hand, the  
235 maximum biomass yield for control yeast (2.0, OD<sub>600nm</sub>) was achieved when the temperature, pH  
236 and incubation time was at 30°C, 5 and 72 hours, respectively. We observed a significant  
237 difference ( $p < 0.05$ ) among the treatments on the combined effect of temperature, pH and  
238 incubation time with regard to biomass yield. The minimum biomass yield was measured for the  
239 isolates AAUTf1 (0.21), AAUTf5 (0.25), AAUTj15 (0.27), AAUSh17 (0.28), AAUMI20 (0.35),  
240 AAUWt21 (0.28) and control (0.49, OD<sub>600nm</sub>) at 40°C, 3.5 pH and 120 hours of incubation time.

## 241 **Hydrogen sulfide production by yeast isolates**

242 On the basis of their H<sub>2</sub>S production (Fig 1), the isolates were grouped into three categories  
243 (non-producers, low level and high level of H<sub>2</sub>S producers). Accordingly, isolate AAUTf1 did  
244 not produce hydrogen sulfide (Fig 1, A), while AAUTf5, AAUTj15 and AAUSh17 produced low  
245 levels of hydrogen sulfide. The commercial yeast also produces low levels H<sub>2</sub>S as well (Fig 1, B).  
246 Isolates AAUMI20 and AAUWt21 produced high level of hydrogen sulfide (Fig 1, C).  
247 Therefore, AAUTf1, AAUTf5, AAUTj15 and AAUSh17 were subjected for further test.

248

249 Fig 1, Hydrogen sulfide (H<sub>2</sub>S) gas production by isolates as detected by black readout on Bismuth  
250 Sulphate Agar plates. A (AAUTf1) - non producer; B (AAUTf5, AAUTj15, AAUSh17 and Commercial  
251 yeast) - low level and C (AAUMI20 and AAUWt21) – high level

252

## 253 **Leavening capacity of isolated yeast strains**

254 The leavening capacity of the non-hydrogen sulphide producer, *C. humilis* strain  
255 (AAUTf1), and the low H<sub>2</sub>S producers *K. bulderi* strain (AAUTf5), *S. cerevisiae* strain  
256 (AAUTj15), and *S. cerevisiae* strain (AAUSh17) were compared to the commercial *S. cerevisiae*.  
257 The results showed that the period of bread dough fermentation at 30°C was short (2 hours)  
258 compared to ambient temperature (Table 6). The maximum mean of leavening activity was seen  
259 by isolate AAUTf1 (131 cm<sup>3</sup>) at 120 min, which was followed by AAUTf5 (128 cm<sup>3</sup>) at 120 min  
260 at 30°C. Similarly, isolates AAUSh17 (127 cm<sup>3</sup>) and AAUTj15 (125 cm<sup>3</sup>) achieved high  
261 leavening activity at 60 min at the same temperature, which was not significantly different  
262 (p>0.05) with the above isolates (AAUTf1 and AAUTf5). The commercial yeasts had 117 cm<sup>3</sup>  
263 mean rising capacity at 90 min which is lower, and takes longer (p<0.05) than that of the  
264 indigenous isolates. Dough left to ferment without yeast (negative control) did not show volume  
265 increment within 3 hours of dough fermentation (Table 6).

266 Table 6. Leavening activity of yeast strains at 24°C and 30°C temperature

| Isolates | Temp  | Mean of rising dough volume (cm <sup>3</sup> )/ Time (min) |                   |                    |                    |                    |                    |                   |
|----------|-------|------------------------------------------------------------|-------------------|--------------------|--------------------|--------------------|--------------------|-------------------|
|          |       | 0 min                                                      | 30 min            | 60 min             | 90 min             | 120 min            | 150 min            | 180 min           |
| AAUTf1   | 24 °C | 0 <sup>i</sup>                                             | 12 <sup>hi</sup>  | 26 <sup>g-i</sup>  | 50 <sup>d-i</sup>  | 63 <sup>a-g</sup>  | 70 <sup>a-g</sup>  | 109 <sup>ab</sup> |
|          | 30 °C | 0 <sup>l</sup>                                             | 32 <sup>kl</sup>  | 46 <sup>i-k</sup>  | 73 <sup>e-j</sup>  | 131 <sup>a</sup>   | 110 <sup>a-e</sup> | 84 <sup>c-h</sup> |
| AAUTf5   | 24 °C | 0 <sup>i</sup>                                             | 35 <sup>f-i</sup> | 51 <sup>d-h</sup>  | 75 <sup>a-g</sup>  | 97 <sup>a-d</sup>  | 81 <sup>a-f</sup>  | 70 <sup>a-g</sup> |
|          | 30 °C | 0 <sup>l</sup>                                             | 40 <sup>jk</sup>  | 80 <sup>d-i</sup>  | 111 <sup>b-d</sup> | 128 <sup>a</sup>   | 124 <sup>ab</sup>  | 81 <sup>d-i</sup> |
| AAUTj15  | 24 °C | 0 <sup>i</sup>                                             | 60 <sup>b-h</sup> | 113 <sup>a</sup>   | 116 <sup>a</sup>   | 87 <sup>a-e</sup>  | 73 <sup>a-g</sup>  | 67 <sup>a-g</sup> |
|          | 30 °C | 0 <sup>l</sup>                                             | 49 <sup>g-k</sup> | 125 <sup>ab</sup>  | 110 <sup>b-d</sup> | 81 <sup>d-i</sup>  | 84 <sup>c-h</sup>  | 77 <sup>d-j</sup> |
| AAUSh17  | 24 °C | 0 <sup>i</sup>                                             | 51 <sup>d-h</sup> | 55 <sup>c-h</sup>  | 59 <sup>b-h</sup>  | 98 <sup>a-d</sup>  | 86 <sup>a-f</sup>  | 82 <sup>a-f</sup> |
|          | 30 °C | 0 <sup>l</sup>                                             | 48 <sup>h-k</sup> | 127 <sup>a</sup>   | 103 <sup>b-e</sup> | 78 <sup>d-i</sup>  | 86 <sup>b-g</sup>  | 63 <sup>f-k</sup> |
| CY       | 24 °C | 0 <sup>i</sup>                                             | 39 <sup>e-i</sup> | 90 <sup>a-d</sup>  | 100 <sup>a-d</sup> | 103 <sup>a-c</sup> | 80 <sup>a-f</sup>  | 73 <sup>a-g</sup> |
|          | 30 °C | 0 <sup>l</sup>                                             | 47 <sup>h-k</sup> | 101 <sup>b-e</sup> | 117 <sup>b-c</sup> | 103 <sup>b-e</sup> | 95 <sup>b-f</sup>  | 78 <sup>d-i</sup> |
| NC       | 24 °C | 0 <sup>i</sup>                                             | 0 <sup>i</sup>    | 0 <sup>i</sup>     | 0 <sup>i</sup>     | 0 <sup>i</sup>     | 0 <sup>i</sup>     | 0 <sup>i</sup>    |
|          | 30 °C | 0 <sup>l</sup>                                             | 0 <sup>l</sup>    | 0 <sup>l</sup>     | 0 <sup>l</sup>     | 0 <sup>l</sup>     | 0 <sup>l</sup>     | 0 <sup>l</sup>    |

267 Note: CY- commercial yeast; NC – negative control.

268 Means with the same letter are not significantly different at  $p < 0.05$ .

269

## 270 Effect of mixed yeast cultures on leavening activity

271 The combined ability of the four selected yeast isolates AAUTf1 (*C. humilis*), AAUTf5  
 272 (*K. bulderi*), AAUTj15 (*S.cerevisiae*) and AAUSh17 (*S.cerevisiae*) on bread dough leavening  
 273 was tested for additive properties of the yeast. Co-inoculated isolates were compared for their  
 274 leavening effect to each of the separate isolates and to that of the control, commercial yeast.

275 Results of the three co-inoculated isolates (AAUTf1+ AAUTf5 + AAUTj15) were found highest  
276 (143 cm<sup>3</sup>) at 90 min; while the raising volume of dough of as result of co-inoculation of different  
277 combination of two (AAUTf5 + AAUTj15) and three (AAUTf1 + AAUTj15 + AAUSh17) yeast  
278 isolates was as high as 141 and 140 cm<sup>3</sup> respectively at 60 min (Table 7). The aroma of the  
279 dough prepared using combined isolates was judged better than of the dough prepared by single  
280 isolates and the commercial bakery yeast, though admittedly, this is a subjective measurement  
281 (data not included).  
282

283 Table 7. Leavening activity of mixed and pure isolates

| Isolate/S | Mean of rising dough volume (cm <sup>3</sup> ) at time (min) |                    |                    |                    |                    |
|-----------|--------------------------------------------------------------|--------------------|--------------------|--------------------|--------------------|
|           | 0 min                                                        | 30 min             | 60 min             | 90 min             | 120 min            |
| X1        | 0 <sup>B</sup>                                               | 32 <sup>zA</sup>   | 46 <sup>w-A</sup>  | 73 <sup>n-w</sup>  | 131 <sup>a-c</sup> |
| X2        | 0 <sup>B</sup>                                               | 40 <sup>y-A</sup>  | 80 <sup>l-t</sup>  | 111 <sup>c-j</sup> | 128 <sup>a-d</sup> |
| X3        | 0 <sup>B</sup>                                               | 49 <sup>v-z</sup>  | 125 <sup>a-e</sup> | 87 <sup>h-t</sup>  | 81 <sup>k-t</sup>  |
| X4        | 0 <sup>B</sup>                                               | 48 <sup>w-z</sup>  | 127 <sup>a-d</sup> | 93 <sup>g-r</sup>  | 78 <sup>l-u</sup>  |
| X5        | 0 <sup>B</sup>                                               | 47 <sup>w-A</sup>  | 101 <sup>d-n</sup> | 117 <sup>b-h</sup> | 103 <sup>c-m</sup> |
| X6        | 0 <sup>B</sup>                                               | 0 <sup>B</sup>     | 0 <sup>B</sup>     | 0 <sup>B</sup>     | 0 <sup>B</sup>     |
| X1X2      | 0 <sup>B</sup>                                               | 49 <sup>v-z</sup>  | 102 <sup>d-m</sup> | 68 <sup>q-y</sup>  | 68 <sup>q-y</sup>  |
| X1X3      | 0 <sup>B</sup>                                               | 44 <sup>x-A</sup>  | 98 <sup>e-o</sup>  | 94 <sup>g-r</sup>  | 83 <sup>j-t</sup>  |
| X1X4      | 0 <sup>B</sup>                                               | 19 <sup>AB</sup>   | 96 <sup>f-q</sup>  | 85 <sup>j-t</sup>  | 66 <sup>r-y</sup>  |
| X2X3      | 0 <sup>B</sup>                                               | 100 <sup>d-n</sup> | 141 <sup>ab</sup>  | 121 <sup>a-h</sup> | 86 <sup>i-t</sup>  |
| X2X4      | 0 <sup>B</sup>                                               | 33 <sup>zA</sup>   | 124 <sup>a-f</sup> | 109 <sup>c-k</sup> | 63 <sup>s-y</sup>  |
| X3X4      | 0 <sup>B</sup>                                               | 64 <sup>s-y</sup>  | 114 <sup>b-i</sup> | 77 <sup>m-v</sup>  | 69 <sup>p-x</sup>  |
| X1X2X3    | 0 <sup>B</sup>                                               | 19 <sup>AB</sup>   | 97 <sup>e-p</sup>  | 143 <sup>a</sup>   | 98 <sup>e-o</sup>  |
| X2X3X4    | 0 <sup>B</sup>                                               | 50 <sup>u-z</sup>  | 128 <sup>a-d</sup> | 93 <sup>g-r</sup>  | 71 <sup>0-x</sup>  |
| X1X3X4    | 0 <sup>B</sup>                                               | 59 <sup>t-z</sup>  | 140 <sup>ab</sup>  | 106 <sup>c-l</sup> | 89 <sup>h-s</sup>  |
| X1X2X3X4  | 0 <sup>B</sup>                                               | 51 <sup>u-z</sup>  | 125 <sup>a-e</sup> | 109 <sup>c-k</sup> | 89 <sup>h-s</sup>  |

284 Note: nomination for isolates X1-AAUTf1; X2-AAUTf5; X3-AAUTj15; X4-AAUSH17; X5-CY (Positive  
 285 control); X6- Negative control.

286 Means with the same letter are not significantly different at  $p < 0.05$ .

287



## 288 **Discussion**

289           The metabolic and production efficiency of cells depends on many factors such as  
290 temperature, pH, incubation period, inoculums size, genetic background [17]. All the isolates,  
291 *Candida humilis* (AAUTf1), *Kazachitania bulderi* (AAUTf5), *Saccharomyces cerevisiae*  
292 (AAUTj15 and AAUSh17), *Pichia fermentans* (AAUMI20) and *Pichia kudrvizivi* (AAUWt21)  
293 showed higher biomass at pH of 5.5, temperature of 30°C and incubation time of 48 hours, while  
294 the commercial yeast (control) had less biomass. This result shows that the isolated yeasts (this  
295 study) had shorter growth times than that of the commercial yeast strain. Similar to this result,  
296 [18] has found that yeasts grew maximally at pH 5 to 5.5, 30°C temperature and 72 hours of  
297 incubation period.

298           All the yeast species and strains in this study could tolerate a temperature up to 40°C  
299 including the control (Table 4). The ability of yeast to tolerate high temperature suggests that the  
300 isolates can withstand excess heat associated with fermentation process and therefore can be  
301 used to accomplish fermentation at a wide range of temperature condition. In agreement with this  
302 study, [19, 20] have also reported that yeasts can grow at elevated temperatures of 40°C, but the  
303 optimal temperature is approximately 30°C.

304           In the current study, a maximum biomass was obtained at 48 hours of incubation period  
305 but the biomass decreased with increasing incubation time. This is supported by the scientific  
306 fact that the stationary phase of yeast growth is a period of no growth, when metabolism slows  
307 and cell division is stopped due to nutrient deprivation, toxic metabolites and high temperatures  
308 which led cells to die and autolyse. In contrary to the present study, [21] have stated that the  
309 highest biomass was recorded after 144 hours of incubation period. The difference in these  
310 results may be due to the genetic constituent of their cells and cultivation conditions.

311           The current study has indicated that isolate AAUTf1 did not produce hydrogen sulfide,  
312 while AAUTf5, AAUTj15 and AAUSh17 including the commercial yeast produced lower  
313 content of this undesirable gas and yet other isolates produced intense dark color on Bismith  
314 Sulfate Agar (BSA) medium [15]. Other scholar, [22] also reported that the highly darkened  
315 color in Lead Acetate Agar (LAA) indicates a greater amount of hydrogen sulfide production.  
316 Therefore, some of the wild yeast isolates in the present study could be a potential candidate for  
317 wheat dough leavening for bread making since they showed low production of H<sub>2</sub>S and also had  
318 better fermentation ability than the commercial yeast. Furthermore, [23] have demonstrated that  
319 yeast strains isolated from fruits and plant parts showed better leavening performance compared  
320 to commercial strains.

321           The results of the present study indicated that the ability of the potent yeast isolates is  
322 comparable or even better than the commercial yeast in leavening of bread dough. Similarly, [24]  
323 have indicated that yeast strains isolated from fruits showed higher leavening activity than that of  
324 the commercial yeast strain. The dough rising power of different brands of baker's yeasts (from  
325 Turkey, China, UK, and Egypt) sold in Egypt have compared and all the yeast strains had  
326 maximum leavening activity after 2 hours of fermentation [3], but the highest leavening activity  
327 showed by the potent yeast isolates between 1 to 2 hours in the current study. This reveals that  
328 the leavening activity of indigenous yeast isolates showed shorter time of fermentation than that  
329 of the commercial baker's yeast making the potent yeast isolates of this study a potential  
330 candidate to be developed into commercial bakery yeast strains after further necessary tests.

331           A combination of the three isolates (AAUTf1 + AAUTf5 + AAUTj15) produced the  
332 highest leavening activity compared to single inoculations. Better performance of combined wild  
333 yeast isolates (this study) could be due to synergetic contribution of the isolates to the dough

334 leavening action as demonstrated by several investigators [25-30], who reported that a  
335 combination of yeasts (non *Saccharomyces cerevisiae* + *Saccharomyces cerevisiae* ) is important  
336 for quality bread leavening and baking purpose. Both isolates of AAUTf1 (*Candida humilis*) and  
337 AAUTf5 (*Kazachistania bulderi*) of this study are uncommon types of yeasts in baking  
338 industries, but they have good leavening ability and aroma than of the commercial yeast  
339 (*S.cerevisiae*). Emphasizing the importance of uncommon yeast strains, [31] have demonstrated  
340 that many uncommon (non-conventional) types of yeasts are used in baking industries that have  
341 the ability to produce unique aroma compounds that *S. cerevisiae* lacks.

342 Overall, it was noticed that the combinations (AAUTf5 + AAUTj15) and (AAUTf1 +  
343 AAUTj15 + AAUSh17) of indigenous yeasts isolated from local substrates showed the highest  
344 leavening ability of bread indicating the possibility of developing indigenous baker's yeasts for  
345 large scale production. Thus, this can potentially increase the varieties of yeasts and ultimately  
346 decrease their importation at huge amount of foreign currencies.

347 Furthermore, this study may even lead to eventual screening of more indigenous potent  
348 yeast blends for local consumption and beyond after conducting various qualifying tests.

349

## 350 **Conclusions**

351 The results of our study demonstrated that fermented foods and drinks harbor potent  
352 baker's yeasts which can be used as dough leavening agents. The optimum growth conditions for  
353 yeasts are 30°C temperature, 5.5 pH and 48 hours of incubation. The yeast isolate  
354 *Saccharomyces cerevisiae* exhibited good leavening activity and *Candida humilis* and  
355 *Kazchistania bulderi* (strains not used before for leavening bread dough) have better capacity of

356 leavening and is concluded to be the most active yeasts to ferment bread dough compared to  
357 other strains including commercial yeast strain. Combinations of isolates (mixed culture) with  
358 *Saccharomyces cerevisiae* showed higher capacity of wheat dough leavening than the indigenous  
359 single isolates (monoculture) and of commercial yeast. Thus, the indigenous isolates are potential  
360 candidates that need fast promotion and utilization in bakery industries. Based on the findings of  
361 this study it is recommended that further investigation should be undertaken on organoleptic  
362 properties and other baker's yeasts qualifying parameters in order to enhance their desirability  
363 and efficiency of the screened strains.

364

## 365 **Acknowledgments**

366 The authors would like to thank Department of Microbial Cellular and Molecular  
367 Biology, Addis Ababa University, Molecular Research Center Advanced Laboratory, Addis  
368 Ababa, Ethiopia and other members of Brown University, USA for their kind collaboration in  
369 providing laboratory and DNA sequencing facilities. We are also thankful of the Ethiopian  
370 Ministry of Science and Technology for the financial support to conduct the research work  
371 herein.

372

373

374

375

376

## 377 **References**

- 378 1. Jensen S, Skibsted LH, Kidmose U, Thybo AK. Addition of cassava flours in bread-  
379 making: sensory and textural evaluation. *LWT-Food Sci Technol.* 2015; 60(1):292-299.
- 380 2. Godfray HCJ, Beddington JR, Crute IR, Haddad L, Lawrence D, Muir JF. Food security:  
381 the challenge of feeding 9 billion people. *Sci.* 2010; 327: 812-818.
- 382 3. Zaky AS, Nasr NF. Easy and efficient method for measuring the rising power of baker's  
383 yeast. *International Food Congress-Novel Approaches in Food Industry 2011*; 650- 654.
- 384 4. Plessas S, Pherson L, Bekatorou A, Nigam P, Koutinas AA. Bread making using kefir  
385 grains as baker's yeast. *Food chemis.* 2005; 93:585-589.
- 386 5. Donalies UE, Nguyen HTT, Stahl U, Nevoigt E. Improvement of *Saccharomyces* yeast  
387 strains used in brewing, wine making and baking. *Adv Biochem Eng Biotechnol.* 2008;  
388 111:67–98.
- 389 6. Edwards WP. *The Science of Bakery Products.* Royal Society of Chemistry, Cambridge;  
390 2007.
- 391 7. Hamelman J. *Bread: A Baker's Book of Techniques and Recipes.* John Wiley, New  
392 York; 2004.
- 393 8. Birch AN, Petersen MA, Hansen AS. The aroma profile of wheat bread crumb influenced  
394 by yeast concentration and fermentation temperature. *Food Sci Technol.* 2013; 50: 480–  
395 488.
- 396 9. Ashenafi M. The microbiology of Ethiopian foods and beverages: A review. *Ethiop J*  
397 *Biol Sci.* 2006; 5: 189-245.
- 398 10. Tamene M, Dawit A. *Evaluation of Yeast Biomass Production using Molasses and*  
399 *Supplements.* LAP LAMBERT Academic Publishing, Germany; 2014.

- 400 11. Arias CR, Burns JK, Friedrich LM, Goodrich RM, Parish ME. Yeast species associated  
401 with orange juice: Evaluation of different identification methods. *Appl Env Microbiol.*  
402 2002; 68: 1955-1961.
- 403 12. Ceccato-Antonini SR, Tosta CD, Silva AC. Determination of yeast killer activity in  
404 fermenting sugarcane juice using selected ethanol making strains. *Brazil Arch Boil*  
405 *Technol.* 2004; 47: 17–39.
- 406 13. Aslankoohi E, Herrera-Malaver B, Rezaei MN, Steensels J, Courtin CM, Verstrepen KJ.  
407 Non-conventional yeast strains increase the aroma complexity of bread. *PloS One.* 2016;  
408 11: e0165126.
- 409 14. Qureshi SK, Masud T, Sammi S. Isolation and taxonomic characterization of yeast strains  
410 on the basis of maltose utilization capacity for bread making. *Int J Agri Biol.* 2007; 9:  
411 110-113.
- 412 15. Jiranek V, Langridge P, Henschke PA. Validation of bismuth containing indicator media  
413 for predicting H<sub>2</sub>S producing potential of *Saccharomyces cerevisiae* wine yeast under  
414 enological conditions. *Am J Enol Vitic.* 1995; 46: 269-273.
- 415 16. Team RC. R: A Language and Environment for Statistical Computing. R Foundation for  
416 statistical Computing, Vienna, Austria. 2016, URL <https://www.R-project.org/>.
- 417 17. Supanwong K, Kazuyoshi O, Shinsaku H. Environmental effects on ethanol tolerance  
418 of *Zymomonas mobilis*. *J. Microbial. Utilization Renewable Resource.* 1983; 3: 254-260.
- 419 18. Dechassa T, Dawit A. Isolation and selection of ethanol tolerant yeasts for the production  
420 of ethanol. M.Sc. Thesis, Addis Ababa University. 2010. Available:  
421 <http://etd.aau.edu.et/handle/123456789/3625>.

- 422 19. Cho IH, Peterson DG Chemistry of bread aroma: a review. Food Sci Biotechnol. 2010;  
423 19: 575–582.
- 424 20. Nitayavardhana S, Shrestha P, Rasmussen ML, Lamsal BP, van Leeuwen JH, Khanal SK.  
425 Ultrasound improved ethanol fermentation from cassava chips in cassava-based ethanol  
426 plants. Bioresource technol. 2010; 101: 2741-2747.
- 427 21. Mamun-Or-Rashid AN, Dash BK, Chowdhury MN, Waheed MF, Pramanik MK.  
428 Exploration of potential baker's yeast from sugarcane juice: optimization and  
429 evaluation. Pak J Biol Sci. 2013; 16: 617-623.
- 430 22. Fellers CR, Shostrom OE, Clark ED. Hydrogen sulfide determination in bacterial cultures  
431 and in certain canned foods. J bacterial. 1924; 9: 235–249.
- 432 23. Noroul A, Ma'aruf Z, Sahilah AG, Mohd AM, Khan A, Wan Aida WM. A new source of  
433 *Saccharomyces cerevisiae* as a leavening agent in bread making. Int Food Res J.  
434 2013; 20: 967-973.
- 435 24. Ma'aruf AG, Noroul AZ, Sakilah AM, Mohd KA. Leavening ability of yeast isolated  
436 from different local fruits in bakery product. Sains Malaysiana. 2011; 40: 1413–1419.
- 437 25. Clemente-Jimenez JM, Mingorance-Cazorla L, Martinez-Rodriguez S, Heras-Vazquez  
438 FJL, Rodriguez-Vico F. Influence of sequential yeast mixtures on wine fermentation. Int  
439 J Food Microbiol. 2005; 98: 301–308.
- 440 26. Moreira N, Mendes F, de Pinho RG, Hogg T, Vasconcelos I. Heavy sulfur compounds,  
441 higher alcohols and esters production profile of *Hanseniaspora uvarum* and  
442 *Hanseniaspora guilliermondii* grown as pure and mixed cultures in grape must. Int J Food  
443 Microbiol. 2008; 124: 231–8.

- 444 27. Domizio P, Romani C, Lencioni L, Comitini F, Gobbi M, Mannazzu I. Outlining a future  
445 for non *Saccharomyces* yeasts: Selection of putative spoilage wine strains to be used in  
446 association with *Saccharomyces cerevisiae* for grape juice fermentation. *Int J Food*  
447 *Microbiol.* 2011; 147: 170–80.
- 448 28. Crafacek M, Mikkelsen MB, Saerens S, Knudsen M, Blennow A, Lowor S. Influencing  
449 cocoa flavour using *Pichia kluyveri* and *Kluyveromyces marxianus* in a defined mixed  
450 starter culture for cocoa fermentation. *Int J Food Microbiol.* 2013; 167: 103–116.
- 451 29. Saerens SM, Swiegers H, Reynolds D. Increasing the sensorial enrichment of white wine  
452 with non-*Saccharomyces* yeast strains. *Australian and New Zealand Grapegrower and*  
453 *Winemaker.* 2013; 599: 94.
- 454 30. Steensels J, Snoek T, Meersman E, Nicolino MP, Voordeckers K, Verstrepen KJ.  
455 Improving industrial yeast strains: exploiting natural and artificial diversity. *FEMS*  
456 *Microbiol Rev.* 2014; 38: 947–995.
- 457 31. Wedral D, Shewfelt R, Frank J. The challenge of *Brettanomyces* in wine. *LWT Food Sci*  
458 *and Technol.* 2010; 43: 1474–1479.

459

## 460 **Figure Legends**

461

462 Fig 1. Hydrogen sulfide (H<sub>2</sub>S) gas production by isolates as detected by black readout on Bismuth  
463 Sulphate Agar plates. A (AAUTf1) - non producer; B (AAUTf5, AAUTj15, AAUSh17 and Commercial  
464 yeast) - low level and C (AAUMI20 and AAUWt21) – high level

465



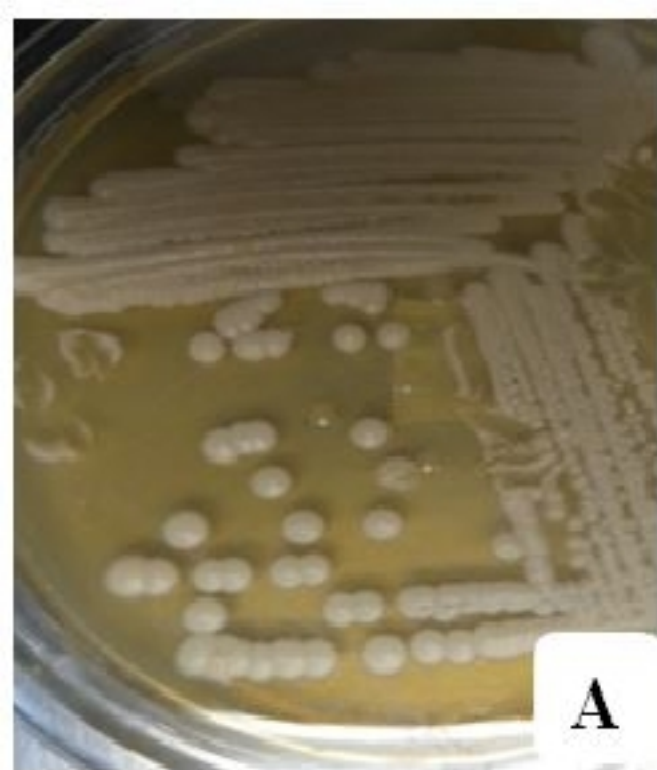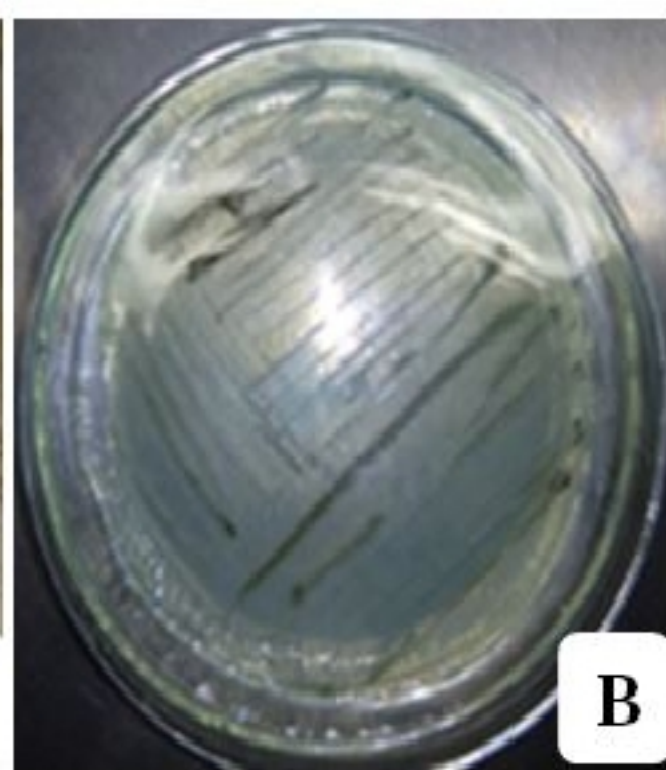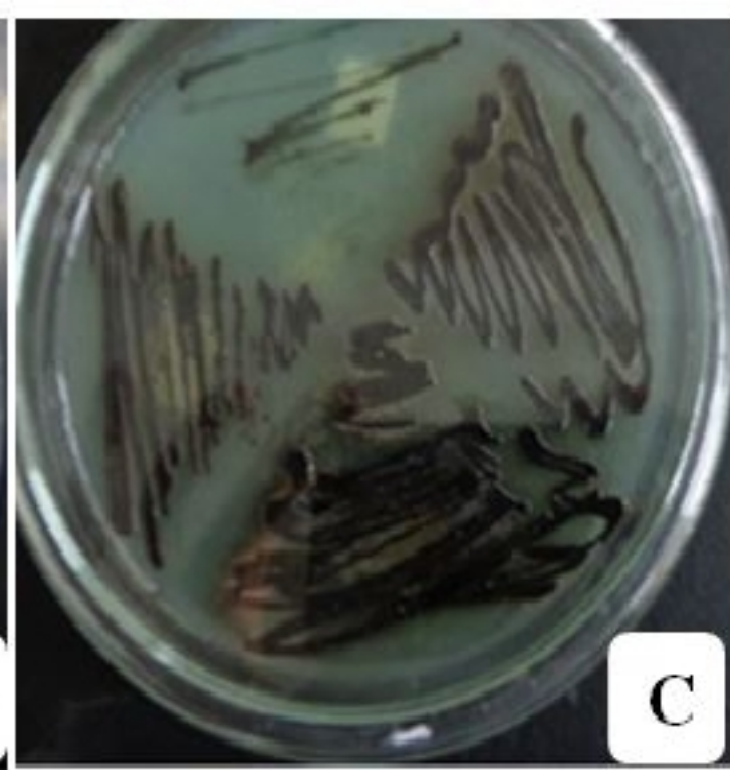

Figure
